# Supplementary material for: Uncovering Transcriptional Regulators and Targets of sRNAs Using an Integrative Data-Mining Approach: H-NS-Regulated RseX as a Case Study
Source: Front Cell Infect Microbiol. 2021 Jul 13;11:696533. doi: 10.3389/fcimb.2021.696533 (PMC8313858; doi:10.3389/fcimb.2021.696533)
Supplement: Supplementary file 1 [file DataSheet_1.xlsx]

## Sheet: Sheet 1
*Hfq dependence evidence confounding [Hör et al. 2020]
† TSS known to be upstream of mature transcript start, IPOD-HR coordinates adjusted to reflect that
^Functional region showed significnt decrease in accessibility in Hfq knockout strain
Coordinates from RefSeq Sequence: NC_000913.3
sRNA	Synoynm in GFF	Direction	IPOD-HR Coordinates		# Differential Peaks	# Unique DBPs Identified	# Novel High Confidence DBPs	Mature Transcript Coordinates		Transcript Length	EHEC Sequence Homology (%)	Manually Added to GFF?	INTERFACE Profile?	Hfq Dependent?	Likely-Functional Region wrt 5' Start of Mature Transcript
			L Coordinate	R Coordinate				L Coordinate	R Coordinate
3ETSleuZ†		R	1991738	1992380	3	16	1	1991748	1991814	67	100	yes		yes
agrA		F	3647863	3648156	3	6	0	3648063	3648146	84	97.143
agrB		F	3648094	3648387	2	1	0	3648294	3648377	84	98.571			yes*
arcZ		F	3350377	3350707	2	10	2	3350577	3350697	121	99.174		yes	yes	[8,16]
arrS		R	3657976	3658254	4	26	13	3657986	3658054	69	100		yes	yes	[8,18]^ [32,44]
chiX		F	507004	507297	4	9	2	507204	507287	84	100		yes	yes
cpxQ†		F	4105585	4106397	6	10	0	4106330	4106387	58	98.276			yes
csrB		R	2924146	2924724	3	4	2	2924156	2924524	369	98.916			yes*
csrC		F	4050836	4051290	2	5	1	4051036	4051280	245	99.592			yes*
cyaR		F	2166914	2167210	3	13	2	2167114	2167200	87	100		yes	yes	[62,76]
dicF		F	1649182	1649444	1	1	0	1649382	1649434	53	100		yes	yes
dsrA		R	2025217	2025513	4	7	1	2025227	2025313	87	100		yes	yes	[29,38] [38,52]
esrE		F	4019778	4020239	0	0	0	4019978	4020229	252	99.603
eyeA		F	272380	272664	0	0	0	272580	272654	75	100
ffs		F	476248	476571	1	0	0	476448	476561	114	100				[4,13]
fnrS		F	1408929	1409260	2	10	2	1409129	1409250	122	100		yes	yes	[84,95]
gadF†		F	3658145	3659092	9	32	14	3658992	3659082	91	100			yes*
gadY		F	3664664	3664978	2	13	4	3664864	3664968	105	100		yes	yes	[68,83]
gcvB		F	2942496	2942911	1	14	2	2942696	2942901	206	100		yes	yes	[163,176]
glmY		R	2691147	2691540	4	16	5	2691157	2691340	184	99.457		yes	yes*
glmZ		F	3986232	3986648	4	7	1	3986432	3986638	207	100		yes	yes
ipeX		R	574355	574731	5	21	11	574365	574531	167	91.667	yes	yes		[128,142]
isrB		R	1987829	1988198	4	20	4	1987839	1987998	160	100	yes	yes	yes*
isrC		F	2071117	2071521	1	9	0	2071317	2071511	195	97.436		yes	yes	[172,187]
istR		R	3853108	3853457	4	7	0	3853118	3853257	140	97.143		yes		[82,97]
mcaS		R	1405646	1405951	4	12	2	1405656	1405751	96	100		yes	yes
mgrR		R	1622807	1623114	2	6	2	1622817	1622914	98	100		yes	yes	[38,53]^ [68,80]
micA		F	2814602	2814889	0	0	0	2814802	2814879	78	98.718		yes	yes
micC		F	1436921	1437239	6	23	2	1437121	1437229	109	100		yes
micF		F	2312884	2313186	4	23	6	2313084	2313176	93	98.925		yes	yes
micL†		R	1958431	1958947	2	1	0	1958441	1958520	80	100		yes	yes	[1,9]
nc1		R	297127	297504	3	10	0	297137	297304	168	98.305	yes
nc2†		F	496939	497955	5	2	0	497801	497945	145	96.429	yes	yes
och5		F	3066987	3067354	4	16	2	3067187	3067344	158	99.367	yes
ohsC		F	2700320	2700606	3	17	2	2700520	2700596	77	100		yes		[1,9]
omrA		R	2976092	2976389	2	7	0	2976102	2976189	88	100		yes	yes
omrB		R	2976294	2976585	2	10	2	2976304	2976385	82	100		yes	yes
oxyS		R	4158275	4158594	3	7	0	4158285	4158394	110	100		yes	yes	[1,9] [38,52]
pspH†		F	4262616	4263260	3	3	1	4263139	4263250	112	99.107	yes		yes*
psrD	sraB	F	1146389	1146767	2	13	3	1146589	1146757	169	99.408		yes		[80,95]^ [133,142]
psrN		F	3238174	3238571	4	7	3	3238374	3238561	188	99.468	yes	yes		[85,99]
psrO	sraG	F	3310983	3311408	3	11	0	3311183	3311398	216	100
ralA		F	1413356	1413744	1	6	1	1413556	1413734	179	100			yes*
rdlA		F	1269123	1269399	2	6	0	1269323	1269389	67	98.413		yes	yes*
rdlB		F	1269658	1269933	1	6	0	1269858	1269923	66	100		yes
rdlC		F	1270193	1270470	3	7	0	1270393	1270460	68	98.361		yes
rdlD		F	3699936	3700211	2	5	0	3700136	3700201	66	100		yes
rirA		R	3808156	3808438	1	5	1	3808166	3808238	73	98.182	yes
rnpB		R	3270206	3270792	8	11	4	3270216	3270592	377	100
rprA		F	1770172	1770487	3	5	0	1770372	1770477	106	100		yes	yes
rseX		F	2033449	2033749	3	19	3	2033649	2033739	91	100		yes	yes*	[1,9]^ [63,77]
rttR		R	1287056	1287436	4	5	0	1287066	1287236	171	96.491
rybA		R	852715	853264	4	12	4	852725	853064	340	99.118		yes		[98,113]
rybB		R	887967	888257	2	3	1	887977	888057	81	100		yes	yes	[50,58]
rydB		R	1764703	1764980	3	11	4	1764713	1764780	68	98.529		yes
rydC		R	1491433	1491706	1	6	0	1491443	1491506	64	100		yes	yes
ryeA		F	1922866	1923324	5	13	2	1923066	1923314	249	99.197		yes	yes*	[80,95]
ryeG		R	2470462	2470865	3	17	4	2470472	2470665	194	100	yes		yes
ryfA		F	2653655	2654168	2	5	2	2653855	2654158	304	95.05		yes		[281,296]
ryfB	shoB	R	2700049	2700577	6	26	2	2700059	2700377	319	96.429		yes		[1,9]
ryfD		R	2734196	2734495	1	3	1	2734206	2734295	90	100		yes	yes*	[25,40] [43,58]
ryhB		R	3580917	3581216	3	8	2	3580927	3581016	90	100		yes	yes	[58,73]
ryjA		R	4277917	4278266	2	8	1	4277927	4278066	140	100		yes
ryjB		F	4527777	4528076	1	1	0	4527977	4528066	90	100		yes	yes*	[76,89]
sdsN†		F	1996706	1997067	2	18	1	1996921	1997057	137	95.62			yes*
sdsR		R	1923094	1923407	2	3	1	1923104	1923207	104	100		yes	yes
sgrS		F	77167	77603	3	13	6	77367	77593	227	90.909		yes	yes
sibA		F	2153109	2153461	2	4	1	2153309	2153451	143	98.261		yes
sibB		F	2153444	2153789	4	2	2	2153644	2153779	136	95.588		yes	yes*
sibC		F	3056649	3056998	5	9	3	3056849	3056988	140	94.964		yes	yes*
sibD		R	3194713	3195065	2	5	0	3194723	3194865	143	98.601		yes	yes*
sibE		R	3195089	3195440	5	7	1	3195099	3195240	142	97.887		yes
sokB		F	1491919	1492184	2	2	1	1492119	1492174	56	100		yes	yes*
sokC		F	16752	17016	0	0	0	16952	17006	55	98.182		yes
sokE		F	607534	607802	3	8	1	607734	607792	59	98.148
sokX		F	2887154	2887419	3	24	2	2887354	2887409	56	96.078			yes*
spot42	spf	F	4049699	4050017	2	17	3	4049899	4050007	109	100		yes	yes	[34,44]^ [101,109]
sraA		R	458718	458984	2	13	0	458728	458784	57	100	yes
sroA		R	75506	75808	3	6	0	75516	75608	93	98.925	yes	yes	yes*
sroC†		R	686671	688096	5	11	1	686681	686843	163	99.387	yes	yes	yes
sroD†		R	1888007	1890007	10	22	1	1888017	1888102	86	100	yes	yes	yes	[68,83]
sroE†		R	2640585	2642080	7	16	1	2640595	2640686	92	100	yes	yes		[82,92]
sroG		R	3184560	3184918	2	3	1	3184570	3184718	149	100	yes	yes
sroH		R	4190317	4190687	4	15	4	4190327	4190487	161	100		yes	yes	[1,9]
ssrA†		F	2755386	2755965	3	4	1	2755593	2755955	363	99.725			yes*
ssrS†		F	3055774	3056175	1	2	1	3055983	3056165	183	100			yes*
symR		F	4579635	4579921	6	9	1	4579835	4579911	77	93.506		yes
tff		F	189512	189857	5	14	3	189712	189847	136	100		yes		[59,71]
tp2		R	122687	123057	1	11	0	122697	122857	161	98.758	yes	yes
tpke11†		F	11944	14178	9	19	1	14080	14168	89	100	yes	yes
tpke70		R	2496184	2496829	4	28	2	2496194	2496629	436	100	yes	yes		[317,331] [337,352]
					284	898	163
