# Supplementary material for: Uncovering Transcriptional Regulators and Targets of sRNAs Using an Integrative Data-Mining Approach: H-NS-Regulated RseX as a Case Study
Source: Front Cell Infect Microbiol. 2021 Jul 13;11:696533. doi: 10.3389/fcimb.2021.696533 (PMC8313858; doi:10.3389/fcimb.2021.696533)
Supplement: Supplementary file 4 [file DataSheet_4.xlsx]

## Sheet: Sheet1
1 Melamed et al. 2020		2 Melamed et al. 2016		3 Waters et al. 2017		4 Iosub et al. 2020
Proposed GO function from transcription regulation pipeline
Gray = no GO term associated with the well-known function listed
*Transcript coordinates from annotated TSS, instead of -100nt prior to start codon
Green = Known target
sRNA	Functional Region Coordinates of sRNA		Predicted Target mRNA	Original Rank	Start of Int. wrt Protein Start	End of Int. wrt Protein Start	Fraction of Region Bound	E	Interactome Studies Support	Gene Ontology Support
arcZ	8	16	oppC	6	55	88	1	-16.11	Hfq4
	8	16	ynaK	11	64	94	1	-15.32
	8	16	clpP*	80	-49	-20	0.888889	-12.4	Hfq1
	8	16	ygbJ	83	57	83	1	-12.31
	8	16	ibsC	128	-98	-44	1	-11.66
arrS	8	18	gadE*	1	-380	-311	1	-81.84	Hfq4	Acid Response - Regulation of Transcription, DNA-templated
		18	yhbT*	4	-22	9	1	-17.49
		18	sgcQ	6	-21	9	1	-16.15
		18	sgcA	9	-13	25	1	-14.32
		18	allE	13	-21	15	0.909091	-13.69
	32	44	gadE*	1	-380	-311	1	-81.84	Hfq4	Acid Response - Regulation of Transcription, DNA-templated
	32	44	ydaY	2	66	100	1	-20.96
	32	44	ydjG	18	-51	-12	1	-12.9
	32	44	ybjS	87	30	53	1	-10.61
	32	44	glyA*	108	-24	5	1	-10.23
cyaR	62	76	metL	479	-4	53	1	-9.58
	62	76	ccmH	620	-46	17	1	-9.01
	62	76	sgbE	665	-68	-42	1	-8.86
	62	76	ydhL	740	33	86	1	-8.62
	62	76	torR*	1144	25	98	1	-7.59		Group Activity - Phosphorelay Signal Transduction System
dsrA	29	38	rpoS*	1	-126	-96	1	-17.99	Hfq1	Global Regulation - Regulation of Gene Expression
	29	38	h-ns*	2	-6	22	1	-14.58	Hfq1,2,4,5 RNaseE3	Global Regulation - DNA-binding Transcription Repressor Activity
	29	38	ypaA	5	56	84	1	-13.28
	29	38	ybcM	6	-8	34	1	-12.94		Global Regulation - DNA-binding Transcription Factor Activity
	29	38	elbB	7	-100	-63	1	-12.54
	38	52	h-ns*	2	-6	22	1	-14.58	Hfq1,2,4,5 RNaseE3	Global Regulation - DNA-binding Transcription Repressor Activity
	38	52	ygeH*	3	-48	-30	1	-13.98		Global Regulation - Regulation of Transcription, DNA-templated
	38	52	argR*	4	5	29	1	-13.42		Global Regulation - Regulation of Transcription, DNA-templated
	38	52	ypaA	5	56	84	1	-13.28
	38	52	ybcM	6	-8	34	1	-12.94		Global Regulation - DNA-binding Transcription Factor Activity
ffs	4	13	ybaZ	1	-100	-76	1	-39.14
	4	13	agaW	8	-91	-35	1	-16.77
	4	13	rimK*	13	-27	22	1	-15.55
	4	13	insH1	20	-99	-11	1	-15.08
	4	13	ihfA*	24	-169	-124	1	-14.88
fnrS	84	95	yciY	36	-70	28	1	-14.24
	84	95	sodB*	45	-37	20	0.833333	-13.95	Hfq1,2 ProQ1
	84	95	yohJ*	50	-50	12	0.916667	-13.73		Envelope Stress - Plasma Membrane
	84	95	sgcQ	53	-12	65	0.916667	-13.63
	84	95	ppk*	62	-6	31	0.916667	-13.38
gadY	68	83	sdhC*	25	-112	-46	1	-14.06
	68	83	ahpF*	28	-312	-262	1	-13.66
	68	83	ydfR	39	-39	21	1	-13.25
	68	83	hemD	44	31	58	1	-12.86
	68	83	yfeS	45	61	90	0.8125	-12.83
gcvB	163	176	hisQ	30	-36	12	1	-20.74	Hfq1,2	Membrane Integrity - Transmembrane Transport
	163	176	ymgD	33	-52	96	1	-20.49		Membrane Integrity - Outer Membrane-bounded Periplasmic Space
	163	176	insD1	45	-67	76	1	-19.78
	163	176	inaA*	52	29	52	0.857143	-19.3	Hfq1,2	Acid Response - Acid-Inducible
	163	176	yfcH	75	-10	29	1	-18.51
ipeX	128	142	accD*	2	-54	-32	0.933333	-16.47	sRNA not captured	Carbon Metabolism - Fatty Acid Biosynthetic Process
	128	142	mraZ*	4	-22	-7	0.866667	-15.22		Membrane Integrity - Regulation of Cell Wall and Division
	128	142	hemH*	7	49	73	1	-14.37
	128	142	pntB	9	-28	11	1	-13.77		Membrane Integrity - Integral Component of Inner Membrane
	128	142	fimD	11	-95	-57	1	-13.58		Membrane Integrity - Fimbrial Usher Porin Activity
isrC	172	187	atoD*	440	-34	-2	0.875	-10.76
	172	187	ybaK	468	54	74	0.8125	-10.64
	172	187	oppA*	688	85	98	0.875	-9.87
	172	187	yfiF	1585	77	98	0.875	-7.9
	172	187	opgC	1721	10	25	0.875	-7.71
istR	82	97	tisB*	1	-126	-81	1	-26.24	sRNA not captured	Antibiotic Resistance - Persister Cell Formation
	82	97	wzyE	2	17	70	1	-21.62
	82	97	wzc	35	59	95	1	-12.1
	82	97	yggX*	56	-95	-65	0.875	-11.19
	82	97	mdlB	119	-84	-42	1	-9.96		Antibiotic Resistance - Xenobiotic Transport
mgrR	38	53	gfcD	1	-55	8	1	-18.16
	38	53	yhjR*	2	61	100	1	-17.54
	38	53	wecF	4	-33	19	0.875	-16.25
	38	53	typA	7	-88	-57	1	-14.96
	38	53	pitA*	15	50	74	0.875	-14.29	Hfq1,2,4,5	Divalent Cation Regulation - Magnesium Ion Homeostasis
	68	80	yjfF	12	-100	-63	1	-14.67
	68	80	recQ	32	-19	20	1	-13.03		Divalent Cation Regulation - Zinc Ion Binding
	68	80	ygdB	52	-65	-23	1	-12.42
	68	80	cheA	58	-26	13	1	-12.31	Hfq1,2
	68	80	atpI*	82	51	79	1	-11.63		Divalent Cation Regulation - Ion Transport
micL	1	9	ycbU	13	-56	-24	1	-12.61		Membrane Integrity - Pilus
	1	9	mtn*	15	-12	33	0.888889	-12.45
	1	9	rne*	20	-430	-401	1	-12.18
	1	9	ypfJ	29	-7	41	0.888889	-11.64		Membrane Integrity - Integral Component of Membrane
	1	9	mhpE	37	-23	14	0.888889	-11.1
ohsC	1	9	shoB*	1	-65	-45	1	-27.12		Toxic Peptide Repression - Programmed Cell Death
	1	9	fliN	2	-91	-71	1	-20.36
	1	9	hsdM	3	-83	-58	1	-18.35
	1	9	tatD	4	46	78	1	-17.93
	1	9	mioC*	5	23	39	1	-16.29
oxyS	1	9	yobF*	85	-32	0	0.888889	-11.28	Hfq4
	1	9	ogrK	109	-16	7	1	-11
	1	9	ihfA*	172	-83	-56	1	-10.26
	1	9	fabZ	195	40	63	1	-10.03
	1	9	yehU	391	-59	34	1	-8.77
	38	52	ydbJ*	5	-27	35	1	-16.86
	38	52	yegU	18	-16	70	1	-13.3
	38	52	secE*	27	-11	66	1	-12.79
	38	52	yehU	391	-59	34	1	-8.77
	38	52	macB	644	-75	-3	1	-7.87
psrD	80	95	yceF	1	-100	7	1	-135.49
	80	95	lptF	6	-62	24	1	-18.06
	80	95	tusD	11	16	90	1	-16.91
	80	95	yebY	29	-59	17	1	-15.12
	80	95	narU*	69	-83	67	1	-13.71		Anaerobic Regulation - Nitrite Transmembrane Transporter Activity
	133	142	wecA*	2	-50	12	1	-22.52		Divalent Cation Regulation - Magnesium Ion Binding
	133	142	hypE	5	60	86	0.8	-18.21		Divalent Cation Regulation - Assembly of Iron Containing Hydrogenase
	133	142	ybaA	7	21	61	1	-17.71
	133	142	tusD	11	16	90	1	-16.91
	133	142	cusS	16	-53	-10	1	-16.55		Divalent Cation Regulation - Metal Ion Binding
psrN	85	99	ycgJ	2134	3	79	1	-7	sRNA not captured
rseX	1	9	yccM	2	-44	19	0.888889	-26.38	sRNA not captured	Membrane Integrity - Integral Component of Membrane
	1	9	fimB*	4	-15	52	0.888889	-24.52		Global Regulation - DNA Binding
	1	9	rpiA*	28	-13	22	1	-20.35
	1	9	eutM	38	-19	25	1	-19.58
	1	9	ihfB*	41	-10	25	1	-19.44		Global Regulation - Regulation of Transcription, DNA-templated
	63	77	lhr*	6	-127	-58	1	-23	sRNA not captured
	63	77	yabP	84	16	85	1	-17.97
	63	77	yciG*	86	3	64	1	-17.91
	63	77	yncJ	89	-49	35	1	-17.88
	63	77	eutA	132	-68	8	1	-16.98
rybA	98	113	metK*	2	-47	64	1	-27.38
	98	113	yfcH	3	-96	14	1	-25.34
	98	113	glmS	5	-16	92	1	-23.11		Carbon Metabolism - Carbohydrate Derivative Metabolic Process
	98	113	dgoD	7	-48	77	1	-22.53		Carbon Metabolism - D-galactonate Catabolic Process
	98	113	relB*	8	-8	99	1	-22.39		Carbon Metabolism - Regulation of Cell Growth in Nutrient Deprivation
rybB	50	58	rnlB*	28	-77	-8	1	-16.74
	50	58	yoaJ	50	57	72	1	-15.5		Membrane Integrity - Integral Component of Plasma Membrane
	50	58	gcd*	121	-22	-7	1	-13.92
	50	58	ilvI*	158	17	29	1	-13.44
	50	58	yicI	329	84	100	1	-12.04		Carbon Metabolism - Carbohydrate Metabolic Process
ryeA	80	95	yceI	27	-54	76	1	-18.65		Membrane Integrity - Periplasmic Space
	80	95	mipA*	88	-9	100	1	-15.71		Membrane Integrity - Cell Outer Membrane
	80	95	acpH	108	-56	3	1	-15.47
	80	95	yeeS	110	14	53	1	-15.37
	80	95	ulaC	169	-98	-55	1	-14.29
ryfA	281	296	apt*	1189	63	79	0.8125	-10.81	sRNA not captured
	281	296	dacB	1301	-78	-56	0.8125	-10.58
	281	296	rluF	2709	-40	-24	0.8125	-8.53
	281	296	nudG	2828	68	97	1	-8.34
	281	296	ypfM*	3158	-41	-3	0.8125	-7.81
ryfB	1	9	tam*	908	-113	-99	0.888889	-11.04	sRNA not captured
	1	9	manZ	934	-36	-23	1	-10.95		Membrane Integrity/Carbon Metabolism - Mannose Transmembrane Transport
	1	9	ygeV*	1000	-43	-31	0.888889	-10.78
	1	9	nhaA*	1005	-114	-103	0.888889	-10.77		Membrane Integrity - Sodium Ion Transmembrane Transporter Activity
	1	9	tonB*	1124	-5	5	0.888889	-10.52		Membrane Integrity - Transmembrane Transport
ryfD	25	40	clpB*	2	-22	18	1	-18.52
	25	40	mqsA	3	-73	-18	1	-17.84
	25	40	gltA*	4	-70	-28	1	-17.42
	25	40	relA*	5	-509	-468	1	-16.95
	25	40	nadE*	6	46	91	1	-16.33
	43	58	mqsA	3	-73	-18	0.8125	-17.84
	43	58	hofC	7	-49	-8	1	-16.28
	43	58	yihV	9	-42	11	1	-15.39
	43	58	ulaG*	10	-13	39	1	-15.36		Anaerobic Regulation - L-Ascorbic Acid Catabolic Process
	43	58	yjgL	12	-100	-60	1	-14.7
ryhB	58	73	lpxA	4	-77	2	1	-20.18
	58	73	ycgN	5	18	69	1	-20.04
	58	73	deoC*	8	-414	-376	1	-19.08
	58	73	cybB	9	29	99	1	-18.83		Divalent Cation Regulation - Heme Binding
	58	73	ygbJ	11	25	93	1	-18.61
ryjB	76	89	sgcA	1	-86	4	1	-134.24
	76	89	plsB*	31	-56	-36	1	-15.89
	76	89	yfjR	195	-86	-58	1	-12
	76	89	tesA*	215	-166	-79	1	-11.76
	76	89	recT	224	-89	-65	0.857143	-11.66
spot 42	34	44	galK*	1	-18	39	1	-18.24		Carbon Metabolism - Galactose Metabolic Process
	34	44	ydaC	2	-78	-21	1	-18.02
	34	44	puuE	6	-35	7	1	-15.21		Anaerobic Regulation - Repressed Under Anaerobic Conditions
	34	44	ybfD	12	41	91	1	-13.96
	34	44	ybbW	13	-28	10	1	-13.94
	101	109	ypdK	2931	88	95	0.888889	-3.55
	101	109	ynbG	2954	-93	-85	0.888889	-3.51
	101	109	glnS*	2973	-81	-73	0.888889	-3.49
	101	109	arpA	2998	93	100	0.888889	-3.44
	101	109	yaiV	3022	87	94	0.888889	-3.4		Anaerobic Regulation - Response to Oxidative Stress
sroD	68	83	pepN*	317	43	94	0.8125	-8.15
	68	83	yjdQ	359	59	85	0.875	-7.93
	68	83	relE	405	-18	71	0.875	-7.74		Carbon Metabolism - Cellular Response to Amino Acid Starvation
	68	83	cyaY	609	52	81	1	-6.97
	68	83	atpB*	810	-135	-65	0.875	-6.35
sroE	82	92	bssS*	767	-58	4	1	-2.85	sRNA not captured	Anaerobic Regulation - Regulation of Single-Species Biofilm Formation
	82	92	rspB	1961	85	94	0.909091	-0.9
	82	92	metL	2105	-6	4	0.909091	-0.74
	82	92	ascG	2163	-9	1	0.909091	-0.66
	82	92	opgH	2279	-100	-90	0.909091	-0.54
sroH	1	9	sppA	188	50	99	1	-11.46
	1	9	rsd*	210	-80	-40	1	-11.24
	1	9	yijF	1242	-41	-13	1	-8.02
	1	9	yjeV*	2974	57	72	1	-5.37
	1	9	leuA	3468	0	24	1	-4.41		Carbon Metabolism - Carboxylic Acid Metabolic Process
tff	59	71	yfjK	2	-80	-1	1	-14.6
	59	71	ykgA	40	-54	39	1	-11.15
	59	71	ibsD	279	27	45	0.846154	-7.97
	59	71	yfaT	315	40	73	0.846154	-7.79
	59	71	tehA*	378	48	74	0.846154	-7.51
tpke70	317	331	torD	17	-87	56	1	-25.05	sRNA not captured
	317	331	yibQ	21	-43	72	1	-24.44
	317	331	rsmF	47	-41	60	1	-21.8
	317	331	yghE	73	-81	68	1	-21.05
	317	331	ynjB	83	-63	50	1	-20.82
	337	352	torD	17	-87	56	1	-25.05	sRNA not captured
	337	352	yibQ	21	-43	72	1	-24.44
	337	352	rsmF	47	-41	60	1	-21.8
	337	352	yghE	73	-81	68	1	-21.05
	337	352	moaD	74	-90	-4	1	-21.05
